# Supplementary material for: Infections, Hospitalizations, and Deaths Among US Nursing Home Residents With vs Without a SARS-CoV-2 Vaccine Booster
Source: PubMed Central journal article supplement (PMC9856563; doi:10.1001/jamanetworkopen.2022.45417), 2022-12-07
Supplement: jamanetwopen-e2245417-s002.pdf [file jamanetwopen-e2245417-s002.pdf]

## Data Sharing Statement

McConeghy. Infections, Hospitalizations, and Deaths Among US Nursing Home Residents With vs Without a SARS-CoV-2 Vaccine Booster. *JAMA Netw Open*. Published December 07, 2022. doi:10.1001/jamanetworkopen.2022.45417

### Data

**Data available:** No

### Additional Information

**Explanation for why data not available:** Sharing data is not permitted under existed DUA and includes personal health information
